# Supplementary material
Source: PubMed Central journal article supplement (PMC7307922)

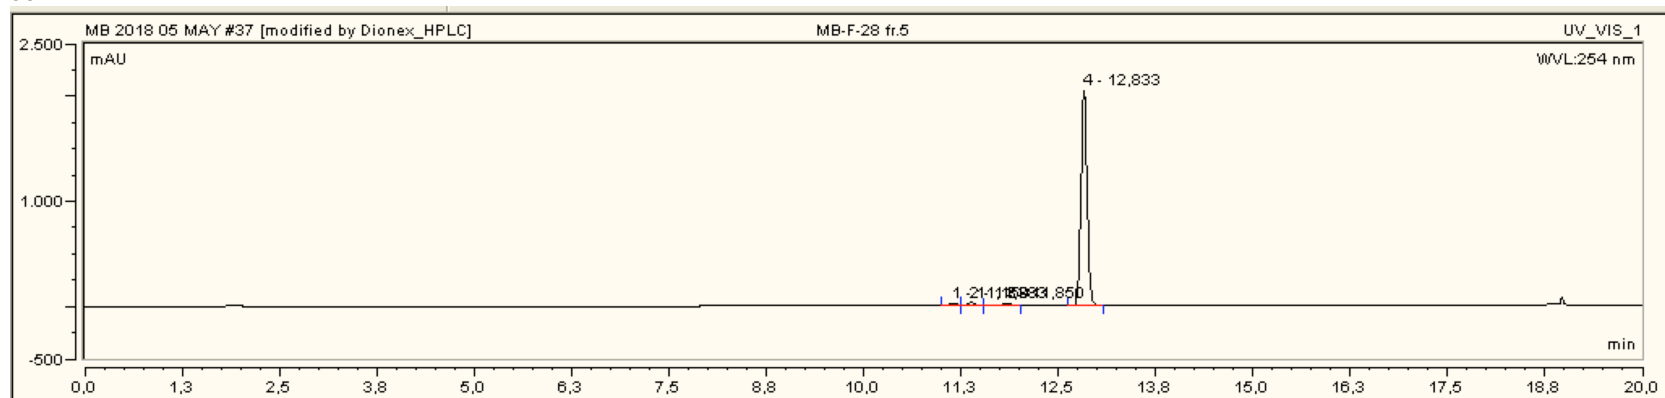

| A             | B        | C               | D               | E             | F    | G               | H             | I          | J | K | L | M | N |
|---------------|----------|-----------------|-----------------|---------------|------|-----------------|---------------|------------|---|---|---|---|---|
| No.           | Peakname | Ret.Time<br>min | Area<br>mAU*min | Amount        | Type | Height<br>mAU   | Rel.Area<br>% | Resolution |   |   |   |   |   |
| 1             | n.a.     | 11,150          | 2,4300          | n.a.          | BM * | 23,523          | 1,25          | 1,50       |   |   |   |   |   |
| 2             | n.a.     | 11,383          | 2,9814          | n.a.          | Mb*  | 29,878          | 1,53          | 2,90       |   |   |   |   |   |
| 3             | n.a.     | 11,850          | 3,1930          | n.a.          | bMB* | 23,787          | 1,64          | 6,33       |   |   |   |   |   |
| 4             | n.a.     | 12,833          | 186,2465        | n.a.          | BMB* | 2040,879        | 95,58         | n.a.       |   |   |   |   |   |
| <b>Total:</b> |          |                 | <b>194,8508</b> | <b>0,0000</b> |      | <b>2118,067</b> | <b>100,00</b> |            |   |   |   |   |   |

1

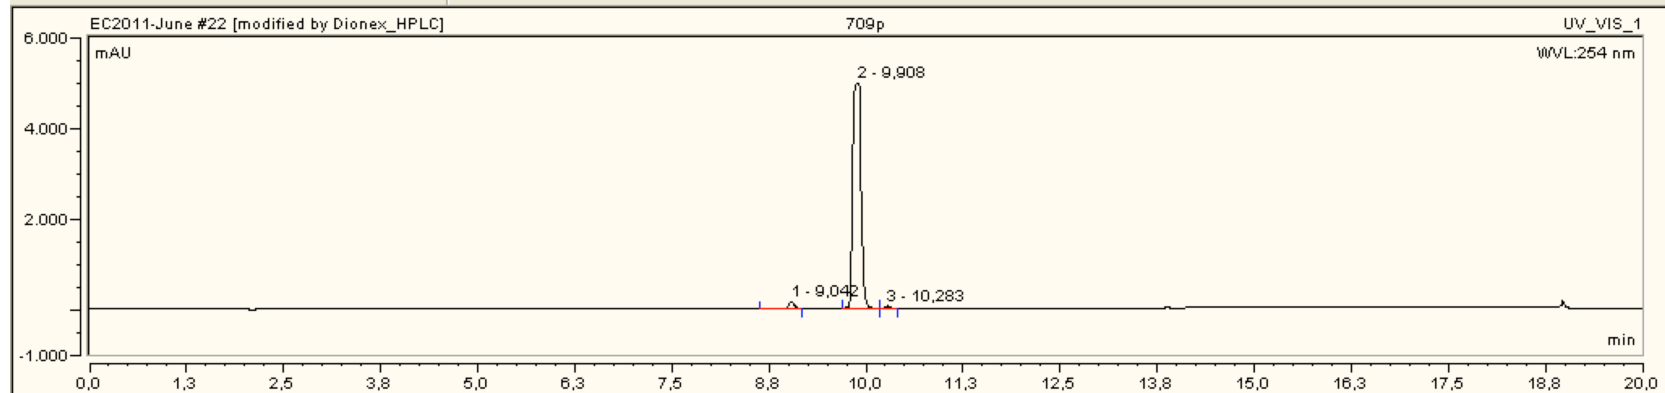

| A             | B        | C               | D               | E             | F    | G               | H             | I          | J | K | L | M | N |
|---------------|----------|-----------------|-----------------|---------------|------|-----------------|---------------|------------|---|---|---|---|---|
| No.           | Peakname | Ret.Time<br>min | Area<br>mAU*min | Amount        | Type | Height<br>mAU   | Rel.Area<br>% | Resolution |   |   |   |   |   |
| 1             | n.a.     | 9,042           | 15,4830         | n.a.          | BMB* | 161,129         | 2,43          | 5,31       |   |   |   |   |   |
| 2             | n.a.     | 9,908           | 617,8106        | n.a.          | BM * | 4979,934        | 96,86         | 2,29       |   |   |   |   |   |
| 3             | n.a.     | 10,283          | 4,5346          | n.a.          | MB*  | 53,214          | 0,71          | n.a.       |   |   |   |   |   |
| <b>Total:</b> |          |                 | <b>637,8282</b> | <b>0,0000</b> |      | <b>5194,277</b> | <b>100,00</b> |            |   |   |   |   |   |

(R)-1

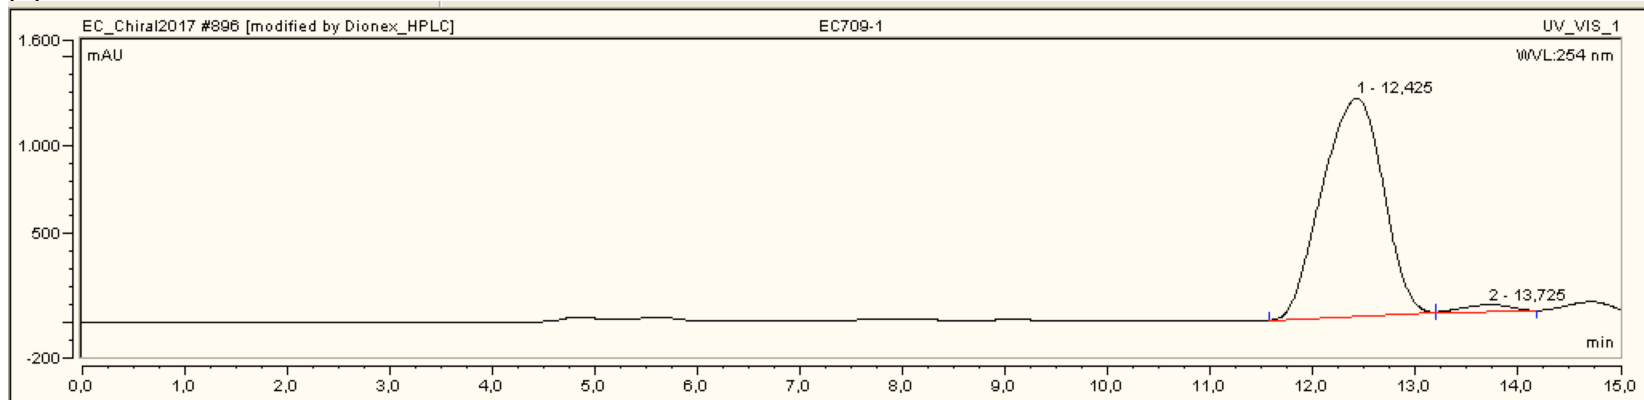

| A             | B        | C            | D               | E             | F    | G               | H             | I          | J | K | L | M | N |
|---------------|----------|--------------|-----------------|---------------|------|-----------------|---------------|------------|---|---|---|---|---|
| No.           | Peakname | Ret.Time min | Area mAU*min    | Amount        | Type | Height mAU      | Rel.Area %    | Resolution |   |   |   |   |   |
| 1             | n.a.     | 12,425       | 847,9346        | n.a.          | BMb  | 1232,869        | 97,81         | 1,28       |   |   |   |   |   |
| 2             | n.a.     | 13,725       | 18,9503         | n.a.          | bMB* | 36,946          | 2,19          | n.a.       |   |   |   |   |   |
| <b>Total:</b> |          |              | <b>866,8849</b> | <b>0,0000</b> |      | <b>1269,814</b> | <b>100,00</b> |            |   |   |   |   |   |

(S)-1

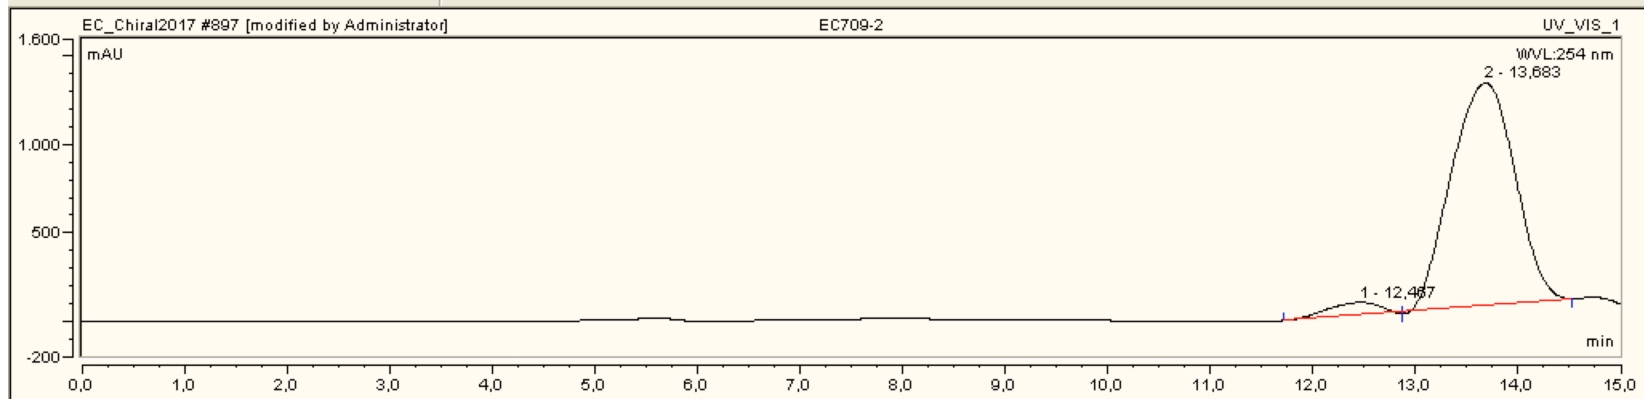

| A             | B        | C            | D               | E             | F    | G               | H             | I          | J | K | L | M | N |
|---------------|----------|--------------|-----------------|---------------|------|-----------------|---------------|------------|---|---|---|---|---|
| No.           | Peakname | Ret.Time min | Area mAU*min    | Amount        | Type | Height mAU      | Rel.Area %    | Resolution |   |   |   |   |   |
| 1             | n.a.     | 12,467       | 39,7629         | n.a.          | BM * | 68,848          | 4,20          | 1,10       |   |   |   |   |   |
| 2             | n.a.     | 13,683       | 906,1812        | n.a.          | MB*  | 1258,553        | 95,80         | n.a.       |   |   |   |   |   |
| <b>Total:</b> |          |              | <b>945,9442</b> | <b>0,0000</b> |      | <b>1327,400</b> | <b>100,00</b> |            |   |   |   |   |   |

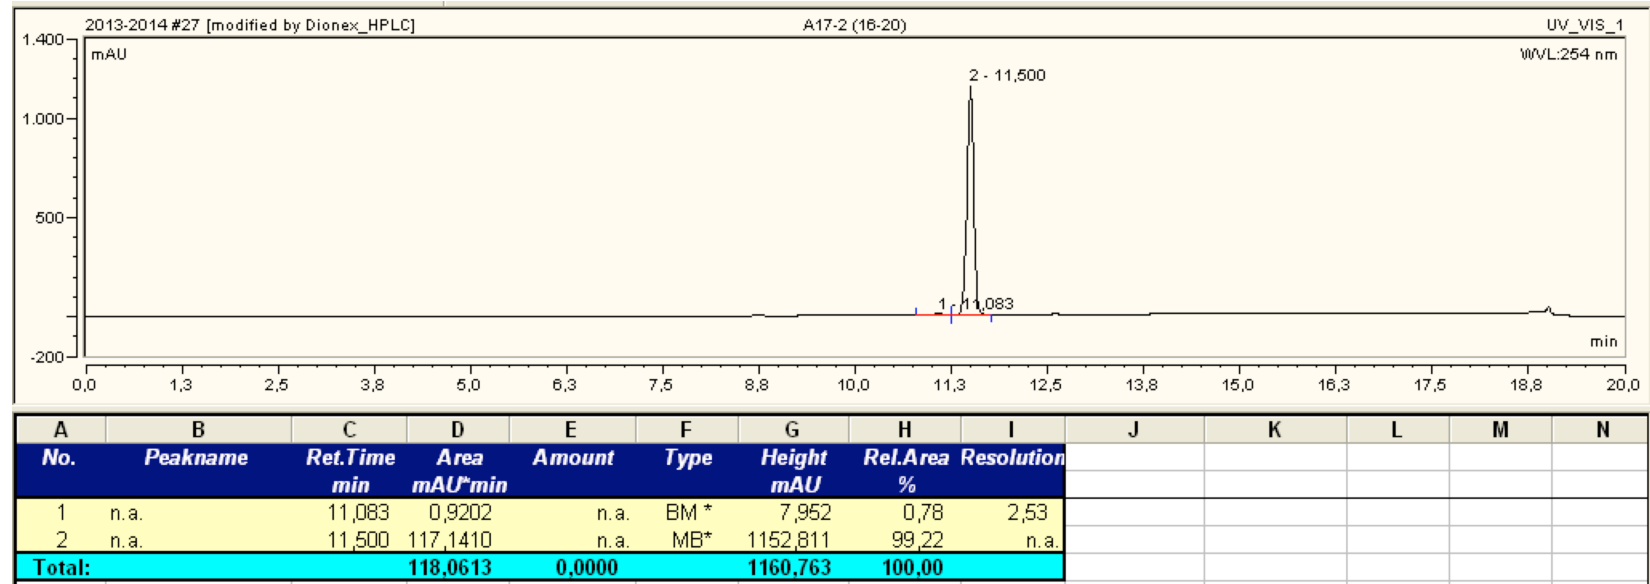

Supplement: jm9b02036_si_001.pdf [file jm9b02036_si_001.pdf]
