# Supplementary material
Source: PubMed Central journal article supplement (PMC7307922)
Supplement: jm9b02036_si_003.pdf [file jm9b02036_si_003.pdf]

## Supporting Information

# Structure-activity relationship studies of tetrahydroquinolone free fatty acid receptor 3 modulators

*Elisabeth Rexen Ulven<sup>†,‡,\*</sup>, Tezz Quon<sup>‡</sup>, Eugenia Sergeev<sup>‡</sup>, Natasja Barki<sup>‡</sup>, Matjaz Brvar<sup>‡</sup>, Brian D. Hudson<sup>‡</sup>, Palash Dutta<sup>†</sup>, Anders Højgaard Hansen<sup>‡</sup>, Line Ø. Bielefeldt<sup>‡</sup>, Andrew B. Tobin<sup>‡</sup>, Christine J. McKenzie<sup>‡</sup>, Graeme Milligan<sup>‡</sup>, Trond Ulven<sup>†</sup>*

<sup>†</sup>Department of Drug Design and Pharmacology, University of Copenhagen, Universitetsparken 2,  
DK-2100 Copenhagen, Denmark

<sup>‡</sup>Department of Physics, Chemistry and Pharmacy, University of Southern Denmark, Campusvej 55,  
DK-5230 Odense M, Denmark

<sup>‡</sup>Centre for Translational Pharmacology, Institute of Molecular, Cell and Systems Biology, College  
of Medical, Veterinary and Life Sciences, University of Glasgow, Glasgow G12 8QQ, Scotland,  
United Kingdom

\*E-mail: eru@sund.ku.dk

### Table of contents

|                                             |    |
|---------------------------------------------|----|
| Crystallographic data for (R)-1 and (R,S)-1 | 2  |
| Molecular modeling of hFFA3                 | 10 |
| Stability of 57 in DMSO                     | 11 |
| Counterscreen data on 1, 16, 57 and 63      | 12 |

Crystallographic data for (*R*)-1 and (*R,S*)-1  
**(*R,S*)-1**

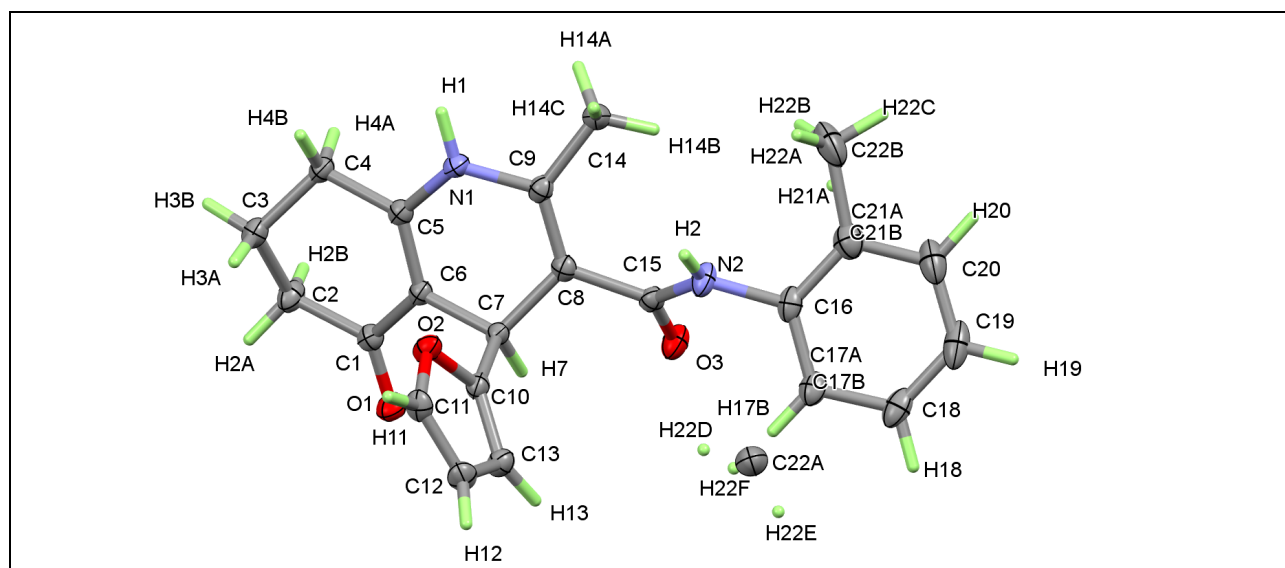

**Figure S1.** Molecular structure with numbering scheme.

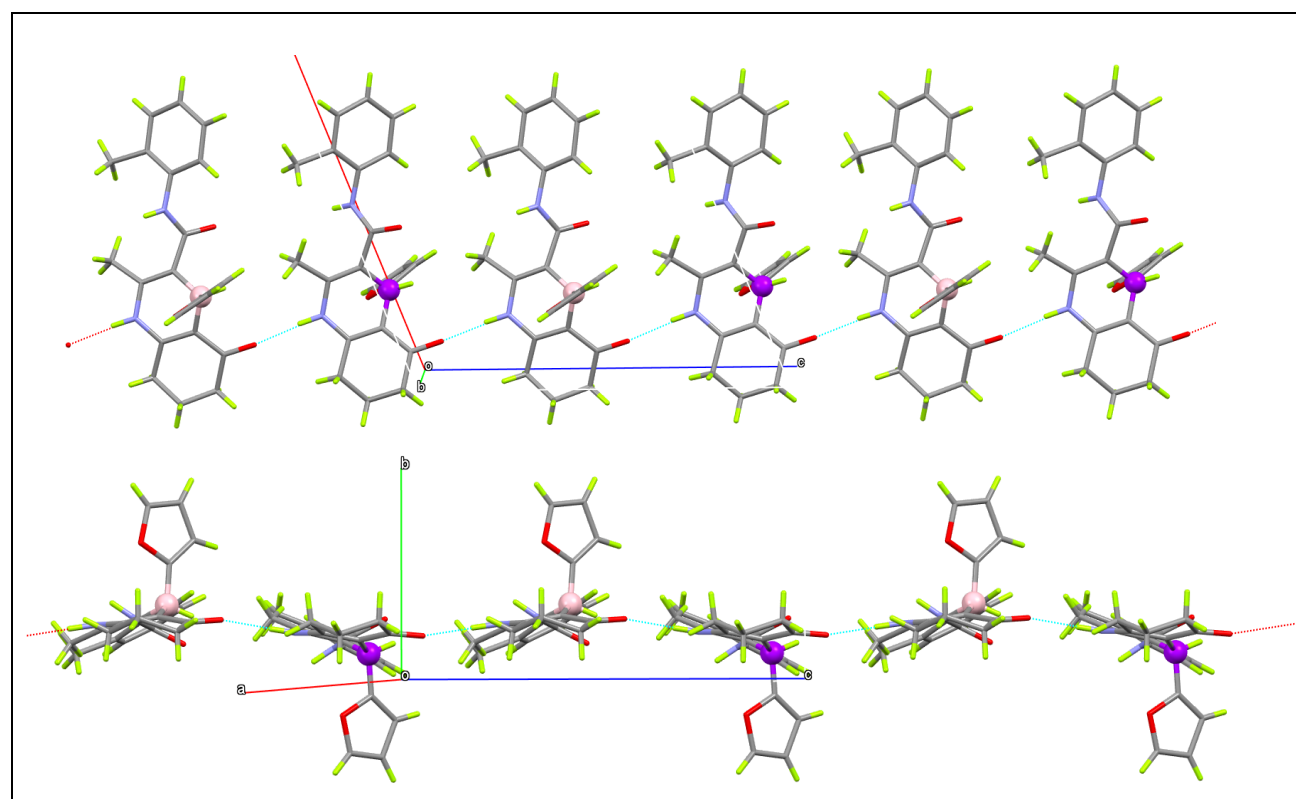

**Figure S2.** Two views, 90° rotated from each other, of the H-bonded ribbons in (*R,S*)-1 running parallel with *c*-axis. The *S* centers are colored pink the *R* centers are colored purple. Only the major position (76%) for the disordered aromatic methyl groups was used in the preparation of the images.

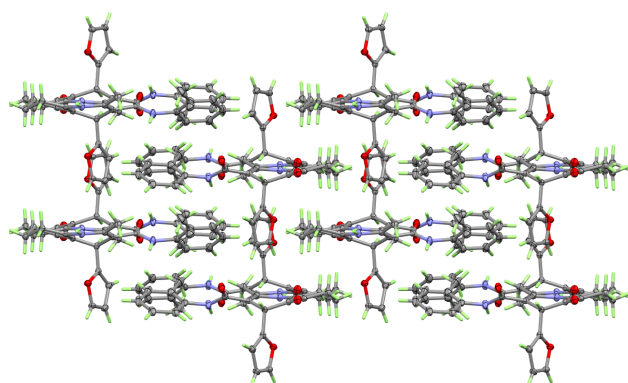

**Figure S3.** Packing in *(R,S)*-1 viewed with the molecules in same orientation as those in (b) (down the *c*-axis).

**Table S1. Crystal data and structure refinement for *(R,S)*-1**

|                                                              |                                                                              |
|--------------------------------------------------------------|------------------------------------------------------------------------------|
| Empirical formula                                            | C <sub>22</sub> H <sub>22</sub> N <sub>2</sub> O <sub>3</sub>                |
| Formula weight                                               | 362.41                                                                       |
| Temperature/K                                                | 293(2)                                                                       |
| Crystal system                                               | monoclinic                                                                   |
| Space group                                                  | <i>P</i> 2 <sub>1</sub> / <i>c</i>                                           |
| <i>a</i> /Å                                                  | 17.6367(2)                                                                   |
| <i>b</i> /Å                                                  | 7.53560(10)                                                                  |
| <i>c</i> /Å                                                  | 14.3717(2)                                                                   |
| $\alpha$ /°                                                  | 90                                                                           |
| $\beta$ /°                                                   | 111.5790(10)                                                                 |
| $\gamma$ /°                                                  | 90                                                                           |
| Volume/Å <sup>3</sup>                                        | 1776.17(4)                                                                   |
| <i>Z</i>                                                     | 4                                                                            |
| $\rho_{\text{calc}}$ /cm <sup>3</sup>                        | 1.355                                                                        |
| $\mu$ /mm <sup>-1</sup>                                      | 0.732                                                                        |
| <i>F</i> (000)                                               | 768.0                                                                        |
| Crystal size/mm <sup>3</sup>                                 | 0.159 × 0.082 × 0.049                                                        |
| Radiation                                                    | CuK $\alpha$ ( $\lambda$ = 1.54184)                                          |
| 2 $\theta$ range for data collection/°                       | 10.788 to 133.202                                                            |
| Index ranges                                                 | -20 ≤ <i>h</i> ≤ 20, -8 ≤ <i>k</i> ≤ 8, -17 ≤ <i>l</i> ≤ 17                  |
| Reflections collected                                        | 36815                                                                        |
| Independent reflections                                      | 3132 [ <i>R</i> <sub>int</sub> = 0.0364, <i>R</i> <sub>sigma</sub> = 0.0139] |
| Data/restraints/parameters                                   | 3132/0/273                                                                   |
| Goodness-of-fit on <i>F</i> <sup>2</sup>                     | 0.876                                                                        |
| Final <i>R</i> indexes [ <i>I</i> ≥ 2 $\sigma$ ( <i>I</i> )] | <i>R</i> <sub>1</sub> = 0.0471, <i>wR</i> <sub>2</sub> = 0.1302              |
| Final <i>R</i> indexes [all data]                            | <i>R</i> <sub>1</sub> = 0.0490, <i>wR</i> <sub>2</sub> = 0.1318              |
| Largest diff. peak/hole / e Å <sup>-3</sup>                  | 0.20/-0.30                                                                   |

**Table S2. Bond Lengths for (R,S)-1**

| Atom | Atom | Length/Å | Atom | Atom | Length/Å  |
|------|------|----------|------|------|-----------|
| O1   | C1   | 1.235(2) | C8   | C15  | 1.498(3)  |
| N1   | C5   | 1.369(2) | C9   | C14  | 1.504(3)  |
| N1   | C9   | 1.404(2) | C10  | C13  | 1.348(3)  |
| C1   | C2   | 1.515(3) | C11  | C12  | 1.344(3)  |
| C1   | C6   | 1.441(3) | C12  | C13  | 1.432(3)  |
| O2   | C10  | 1.373(2) | C16  | C17B | 1.396(3)  |
| O2   | C11  | 1.375(2) | C16  | C21B | 1.387(3)  |
| N2   | C15  | 1.347(3) | C16  | C17A | 1.396(3)  |
| N2   | C16  | 1.433(2) | C16  | C21A | 1.387(3)  |
| C2   | C3   | 1.520(3) | C18  | C19  | 1.386(3)  |
| O3   | C15  | 1.227(2) | C18  | C17B | 1.395(3)  |
| C3   | C4   | 1.519(3) | C18  | C17A | 1.395(3)  |
| C4   | C5   | 1.499(2) | C19  | C20  | 1.381(4)  |
| C5   | C6   | 1.365(3) | C20  | C21B | 1.386(3)  |
| C6   | C7   | 1.512(2) | C20  | C21A | 1.386(3)  |
| C7   | C8   | 1.525(3) | C21B | C22B | 1.579(11) |
| C7   | C10  | 1.502(3) | C17A | C22A | 1.518(3)  |
| C8   | C9   | 1.343(3) |      |      |           |

**Table S3. Bond Angles for (R,S)-1**

| Atom | Atom | Atom | Angle/°    | Atom | Atom | Atom | Angle/°    |
|------|------|------|------------|------|------|------|------------|
| C5   | N1   | C9   | 121.80(16) | C13  | C10  | C7   | 133.99(18) |
| O1   | C1   | C2   | 120.00(17) | C12  | C11  | O2   | 110.52(17) |
| O1   | C1   | C6   | 121.87(17) | C11  | C12  | C13  | 106.09(17) |
| C6   | C1   | C2   | 118.11(16) | C10  | C13  | C12  | 107.15(17) |
| C10  | O2   | C11  | 106.51(15) | N2   | C15  | C8   | 116.82(16) |
| C15  | N2   | C16  | 125.14(17) | O3   | C15  | N2   | 122.37(17) |
| C1   | C2   | C3   | 113.01(16) | O3   | C15  | C8   | 120.79(17) |
| C4   | C3   | C2   | 110.40(16) | C17B | C16  | N2   | 121.05(18) |
| C5   | C4   | C3   | 111.36(15) | C21B | C16  | N2   | 117.54(19) |
| N1   | C5   | C4   | 116.79(16) | C21B | C16  | C17B | 121.29(18) |
| C6   | C5   | N1   | 119.85(16) | C17A | C16  | N2   | 121.05(18) |
| C6   | C5   | C4   | 123.26(17) | C21A | C16  | N2   | 117.54(19) |
| C1   | C6   | C7   | 119.66(16) | C21A | C16  | C17A | 121.29(18) |
| C5   | C6   | C1   | 120.53(16) | C19  | C18  | C17B | 121.1(2)   |
| C5   | C6   | C7   | 119.77(16) | C19  | C18  | C17A | 121.1(2)   |
| C6   | C7   | C8   | 110.46(15) | C20  | C19  | C18  | 120.2(2)   |
| C10  | C7   | C6   | 112.11(15) | C19  | C20  | C21B | 119.8(2)   |
| C10  | C7   | C8   | 110.40(15) | C19  | C20  | C21A | 119.8(2)   |
| C9   | C8   | C7   | 120.32(16) | C18  | C17B | C16  | 117.8(2)   |
| C9   | C8   | C15  | 125.53(17) | C16  | C21B | C22B | 126.2(4)   |

|     |     |     |            |     |      |      |            |
|-----|-----|-----|------------|-----|------|------|------------|
| C15 | C8  | C7  | 114.07(15) | C20 | C21B | C16  | 119.8(2)   |
| N1  | C9  | C14 | 112.77(16) | C20 | C21B | C22B | 113.6(4)   |
| C8  | C9  | N1  | 119.45(17) | C16 | C17A | C22A | 124.46(19) |
| C8  | C9  | C14 | 127.67(17) | C18 | C17A | C16  | 117.8(2)   |
| O2  | C10 | C7  | 116.24(16) | C18 | C17A | C22A | 117.7(2)   |
| C13 | C10 | O2  | 109.72(17) | C20 | C21A | C16  | 119.8(2)   |

**Table S4. Hydrogen Bonds for (*R,S*)-1**

| <b>D</b> | <b>H</b> | <b>A</b>        | <b>d(D-H)/Å</b> | <b>d(H-A)/Å</b> | <b>d(D-A)/Å</b> | <b>D-H-A/°</b> |
|----------|----------|-----------------|-----------------|-----------------|-----------------|----------------|
| N1       | H1       | O1 <sup>1</sup> | 0.91(3)         | 1.95(3)         | 2.857(2)        | 174(2)         |

<sup>1</sup>+X,1/2-Y,-1/2+Z

## Structure of (*R*)-1

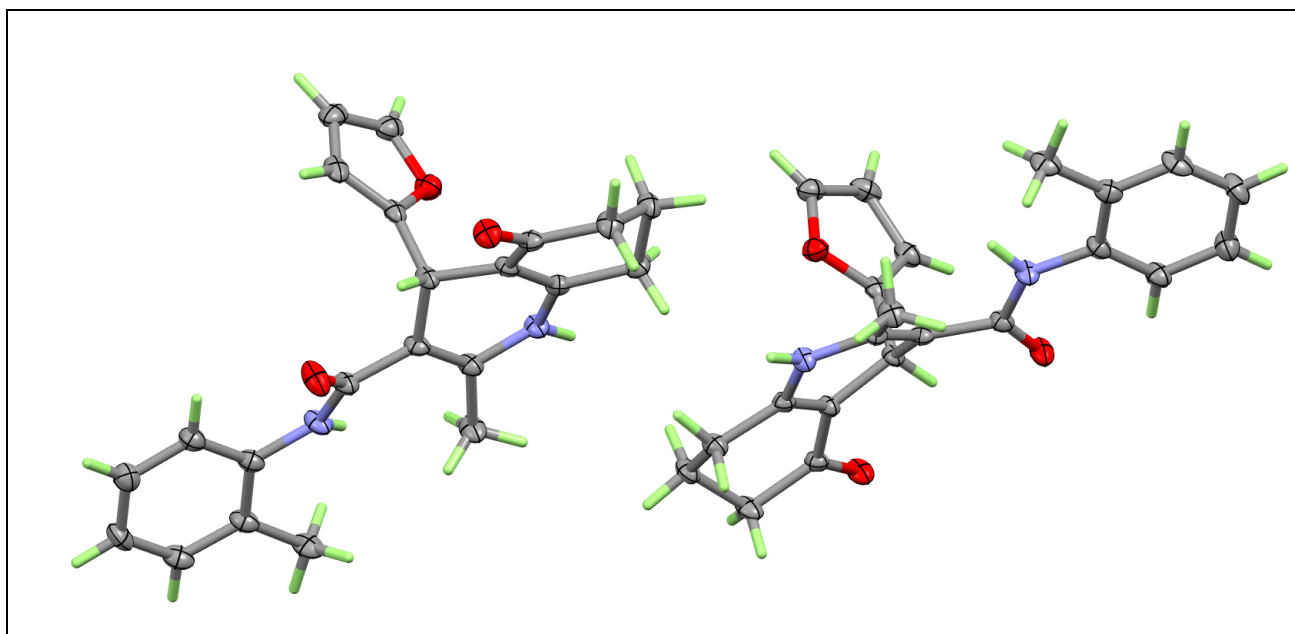

**Figure S4.** Both molecules of the asymmetric unit, molecule B on left, molecule A on right. The numbering scheme is provided in the manuscript.

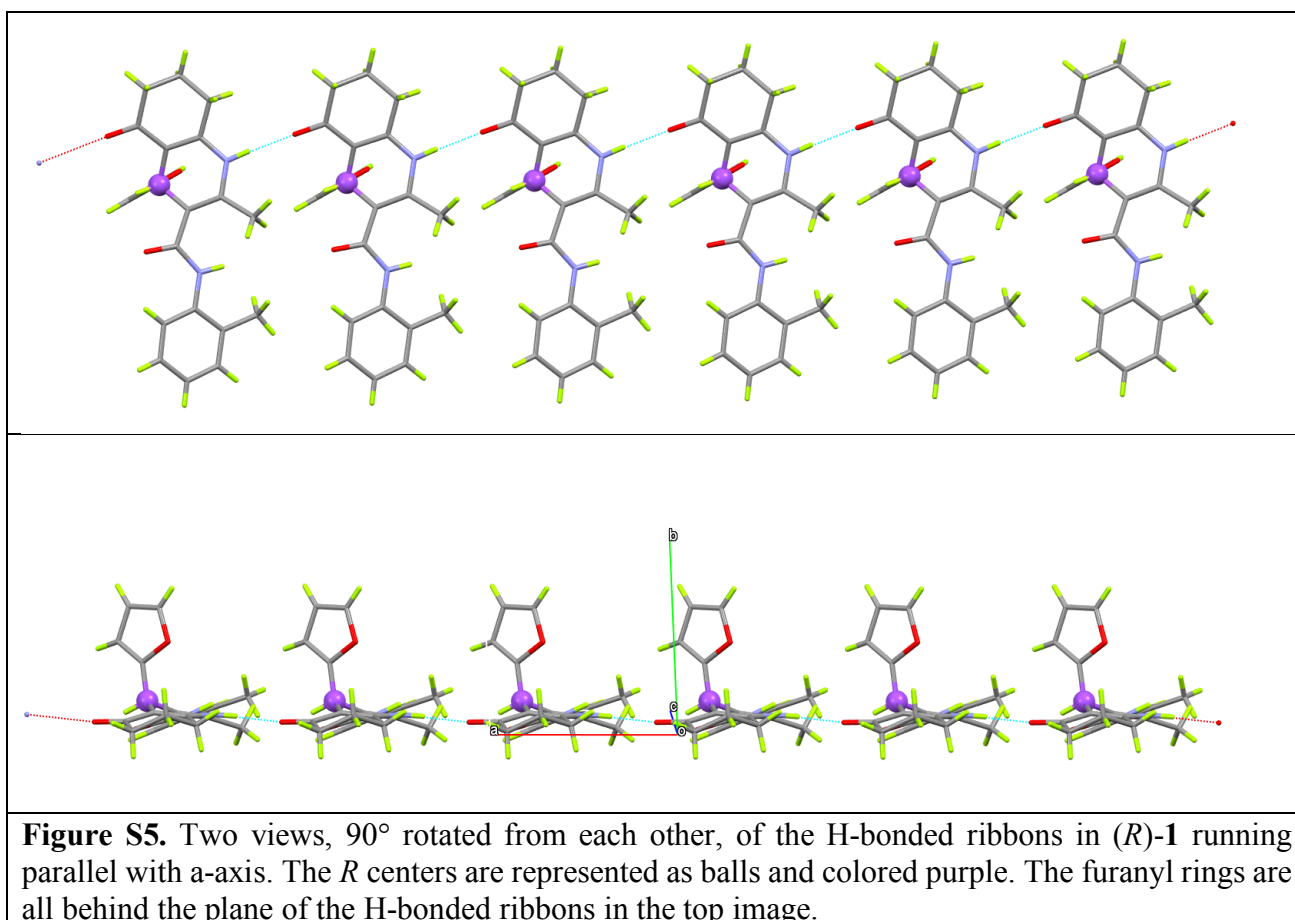

**Figure S5.** Two views, 90° rotated from each other, of the H-bonded ribbons in (*R*)-1 running parallel with a-axis. The *R* centers are represented as balls and colored purple. The furanyl rings are all behind the plane of the H-bonded ribbons in the top image.

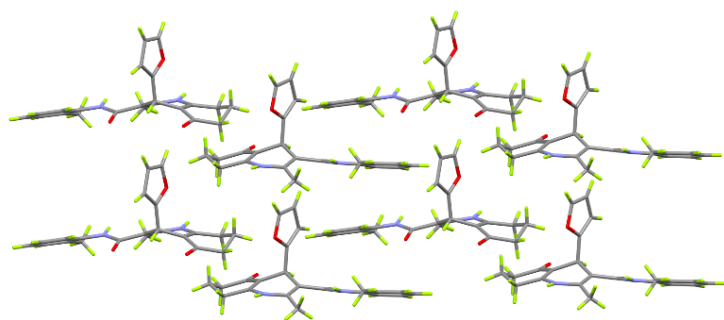

**Figure S6.** Packing in (*R*)-**1** viewed with the molecules in same orientation as those in (b) (down the *c*-axis).

**Table S5 Crystal data and structure refinement for (*R*)-**1**.**

|                                                              |                                                                              |
|--------------------------------------------------------------|------------------------------------------------------------------------------|
| Identification code                                          | cmck2_twin1_hklf4_a                                                          |
| Empirical formula                                            | C <sub>22</sub> H <sub>22</sub> N <sub>2</sub> O <sub>3</sub>                |
| Formula weight                                               | 362.41                                                                       |
| Temperature/K                                                | 293(2)                                                                       |
| Crystal system                                               | triclinic                                                                    |
| Space group                                                  | P1                                                                           |
| <i>a</i> /Å                                                  | 7.1817(3)                                                                    |
| <i>b</i> /Å                                                  | 7.4711(3)                                                                    |
| <i>c</i> /Å                                                  | 16.6298(4)                                                                   |
| $\alpha$ /°                                                  | 87.768(3)                                                                    |
| $\beta$ /°                                                   | 87.408(3)                                                                    |
| $\gamma$ /°                                                  | 87.615(3)                                                                    |
| Volume/Å <sup>3</sup>                                        | 889.98(6)                                                                    |
| <i>Z</i>                                                     | 2                                                                            |
| $\rho_{\text{calc}}$ /cm <sup>3</sup>                        | 1.352                                                                        |
| $\mu$ /mm <sup>-1</sup>                                      | 0.730                                                                        |
| <i>F</i> (000)                                               | 384.0                                                                        |
| Crystal size/mm <sup>3</sup>                                 | 0.134 × 0.085 × 0.033                                                        |
| Radiation                                                    | CuK $\alpha$ ( $\lambda$ = 1.54184)                                          |
| 2 $\theta$ range for data collection/°                       | 11.864 to 152.862                                                            |
| Index ranges                                                 | -8 ≤ <i>h</i> ≤ 8, -9 ≤ <i>k</i> ≤ 9, -20 ≤ <i>l</i> ≤ 20                    |
| Reflections collected                                        | 16586                                                                        |
| Independent reflections                                      | 6283 [ <i>R</i> <sub>int</sub> = 0.0454, <i>R</i> <sub>sigma</sub> = 0.0384] |
| Data/restraints/parameters                                   | 6283/3/507                                                                   |
| Goodness-of-fit on <i>F</i> <sup>2</sup>                     | 0.989                                                                        |
| Final <i>R</i> indexes [ <i>I</i> ≥ 2 $\sigma$ ( <i>I</i> )] | <i>R</i> <sub>1</sub> = 0.0371, <i>wR</i> <sub>2</sub> = 0.0936              |
| Final <i>R</i> indexes [all data]                            | <i>R</i> <sub>1</sub> = 0.0410, <i>wR</i> <sub>2</sub> = 0.0952              |
| Largest diff. peak/hole / e Å <sup>-3</sup>                  | 0.19/-0.22                                                                   |
| Flack parameter                                              | 0.04(12)                                                                     |

**Table S6. Bond Lengths for (R)-1**

| Atom | Atom | Length/Å | Atom | Atom | Length/Å |
|------|------|----------|------|------|----------|
| C1B  | O1B  | 1.244(3) | C7A  | C10A | 1.499(4) |
| C1B  | C2B  | 1.501(4) | C6B  | C7B  | 1.512(4) |
| C1B  | C6B  | 1.444(4) | C8A  | C9A  | 1.357(4) |
| N1B  | C5B  | 1.364(4) | C8A  | C15A | 1.493(4) |
| N1B  | C9B  | 1.402(4) | C7B  | C8B  | 1.532(3) |
| C1A  | O1A  | 1.234(3) | C7B  | C10B | 1.499(4) |
| C1A  | C2A  | 1.515(4) | C9A  | C14A | 1.497(4) |
| C1A  | C6A  | 1.444(4) | C8B  | C9B  | 1.344(4) |
| N1A  | C5A  | 1.368(3) | C8B  | C15B | 1.498(4) |
| N1A  | C9A  | 1.403(3) | C10A | C13A | 1.354(4) |
| C2A  | C3A  | 1.524(4) | C9B  | C14B | 1.507(4) |
| N2A  | C15A | 1.370(4) | C11A | C12A | 1.343(5) |
| N2A  | C16A | 1.411(4) | C10B | C13B | 1.352(4) |
| O2A  | C10A | 1.373(4) | C12A | C13A | 1.426(4) |
| O2A  | C11A | 1.368(3) | C11B | C12B | 1.339(5) |
| C3A  | C4A  | 1.519(4) | C12B | C13B | 1.426(4) |
| O3A  | C15A | 1.227(3) | C16A | C17A | 1.409(4) |
| C2B  | C3B  | 1.529(4) | C16A | C21A | 1.393(4) |
| N2B  | C15B | 1.359(4) | C17A | C18A | 1.385(4) |
| N2B  | C16B | 1.424(4) | C17A | C22A | 1.509(4) |
| O2B  | C10B | 1.376(3) | C16B | C17B | 1.412(4) |
| O2B  | C11B | 1.371(4) | C16B | C21B | 1.385(4) |
| C4A  | C5A  | 1.502(4) | C18A | C19A | 1.384(5) |
| C3B  | C4B  | 1.529(4) | C17B | C18B | 1.390(4) |
| O3B  | C15B | 1.226(3) | C17B | C22B | 1.510(4) |
| C5A  | C6A  | 1.361(4) | C19A | C20A | 1.388(4) |
| C4B  | C5B  | 1.499(4) | C18B | C19B | 1.381(5) |
| C6A  | C7A  | 1.511(3) | C20A | C21A | 1.388(4) |
| C5B  | C6B  | 1.363(4) | C19B | C20B | 1.388(4) |
| C7A  | C8A  | 1.514(4) | C20B | C21B | 1.393(4) |

**Table S7. Bond Angles for (R)-1**

| Atom | Atom | Atom | Angle/°  | Atom | Atom | Atom | Angle/°  |
|------|------|------|----------|------|------|------|----------|
| O1B  | C1B  | C2B  | 120.2(3) | C9B  | C8B  | C15B | 127.5(2) |
| O1B  | C1B  | C6B  | 121.8(3) | C15B | C8B  | C7B  | 113.4(2) |
| C6B  | C1B  | C2B  | 118.1(2) | O2A  | C10A | C7A  | 116.5(2) |
| C5B  | N1B  | C9B  | 122.2(2) | C13A | C10A | O2A  | 109.4(2) |
| O1A  | C1A  | C2A  | 119.8(2) | C13A | C10A | C7A  | 134.1(3) |
| O1A  | C1A  | C6A  | 121.9(2) | N1B  | C9B  | C14B | 112.2(2) |
| C6A  | C1A  | C2A  | 118.3(2) | C8B  | C9B  | N1B  | 119.4(2) |
| C5A  | N1A  | C9A  | 122.1(2) | C8B  | C9B  | C14B | 128.1(3) |



C1A C2A C3A 112.6(2)  
 C15A N2A C16A 128.8(2)  
 C11A O2A C10A 106.8(2)  
 C4A C3A C2A 110.3(3)  
 C1B C2B C3B 113.0(3)  
 C15B N2B C16B 126.7(2)  
 C11B O2B C10B 107.1(2)  
 C5A C4A C3A 111.0(2)  
 C2B C3B C4B 109.6(2)  
 N1A C5A C4A 117.0(2)  
 C6A C5A N1A 119.4(2)  
 C6A C5A C4A 123.5(2)  
 C5B C4B C3B 110.6(2)  
 C1A C6A C7A 119.8(2)  
 C5A C6A C1A 120.3(2)  
 C5A C6A C7A 119.9(2)  
 N1B C5B C4B 117.2(2)  
 C6B C5B N1B 118.9(3)  
 C6B C5B C4B 123.8(2)  
 C6A C7A C8A 110.5(2)  
 C10A C7A C6A 111.9(2)  
 C10A C7A C8A 110.7(2)  
 C1B C6B C7B 120.7(2)  
 C5B C6B C1B 119.8(2)  
 C5B C6B C7B 119.4(2)  
 C9A C8A C7A 119.9(2)  
 C9A C8A C15A 126.4(2)  
 C15A C8A C7A 113.6(2)  
 C6B C7B C8B 109.8(2)  
 C10B C7B C6B 111.5(2)  
 C10B C7B C8B 110.9(2)  
 N1A C9A C14A 112.5(2)  
 C8A C9A N1A 118.9(2)  
 C8A C9A C14A 128.5(3)  
 C9B C8B C7B 119.1(2)

C12A C11A O2A 110.4(3)  
 O2B C10B C7B 116.7(2)  
 C13B C10B O2B 108.9(2)  
 C13B C10B C7B 134.3(3)  
 C11A C12A C13A 106.5(2)  
 C12B C11B O2B 110.1(3)  
 C10A C13A C12A 106.9(3)  
 C11B C12B C13B 106.6(3)  
 C10B C13B C12B 107.2(3)  
 N2A C15A C8A 117.5(2)  
 O3A C15A N2A 122.6(3)  
 O3A C15A C8A 119.8(2)  
 C17A C16A N2A 116.6(3)  
 C21A C16A N2A 122.7(3)  
 C21A C16A C17A 120.7(3)  
 N2B C15B C8B 117.4(2)  
 O3B C15B N2B 122.6(3)  
 O3B C15B C8B 119.9(2)  
 C16A C17A C22A 121.9(3)  
 C18A C17A C16A 117.7(3)  
 C18A C17A C22A 120.3(3)  
 C17B C16B N2B 117.4(3)  
 C21B C16B N2B 121.8(2)  
 C21B C16B C17B 120.7(3)  
 C19A C18A C17A 122.0(3)  
 C16B C17B C22B 121.4(3)  
 C18B C17B C16B 117.6(3)  
 C18B C17B C22B 121.0(3)  
 C18A C19A C20A 119.6(3)  
 C19B C18B C17B 121.9(3)  
 C21A C20A C19A 120.0(3)  
 C18B C19B C20B 120.0(3)  
 C20A C21A C16A 119.9(3)  
 C19B C20B C21B 119.4(3)  
 C16B C21B C20B 120.3(3)

## Molecular modeling of hFFA3

A homology model of hFFA3 was constructed using Modeller 9.17 based on the crystal structure of hFFA1 (PDB code 5TZY)<sup>1</sup> using manual alignment (Clustalx coloring):

```
FFA1 (5TZY)  DLPPQLSFGLYVAAFALGFPLNVLAIRGATAHARLRRLTPSAVYALNLGCSDLLLTVSLPLKAVEALASGAWPLPASLCPV
hFFA3 model  SGNHWVFSVYLLTFLVGLPLNLLALVVVFKLQRRPVAVDVLLNLTASDLLLLLFLPFRMVEAANGMHWPLPFILCPL

FFA1 (5TZY)  FAVAHFFPLYAGGGFLAALSARYLGAAFLGYQAFRRPCYSWCVCAAIWALVLCGLGVFGLLEAPGGWLDHSNTSLGIN
hFFA3 model  SGFIFFTTIYLTALFLAAVSIERFLSVAHPLWKTRPRLGQAGLVSVACWLLASAHCSVVYVIE---FSGDISSH-SQGTN

FFA1 (5TZY)  TP-NGSPVCL EAW--D-PASAGPARFSL SLLFFLP LAITAFCFVGCRLRALR--LTHRRKLR AAWVAGGALLTLLL CVG
hFFA3 model  G-----TCYLEFRKDQLAILLPVRL EMAVLFVPLIITSYCY SRLVWILGRG-GSHRRQR RVAGLLAATLLNFLVCFG

FFA1 (5TZY)  PYNASNVASF LYPNLGGSWRKLGLITGAWSVLNP LVTGY-----
hFFA3 model  PYNVSHVVG YICGE-SPAWR IYVTL LSTLNSCVDPFVY-YFSSSGFQADFHELLRRRLCG-LWGQWQ QESS-MELKEQKGG

FFA1 (5TZY)  -----
hFFA3 model  E-EQRADRPAER-KTSEHSQCGG-TGGQVACA
```

The receptor was prepared using Protein Preparation in Maestro 2015-3 (Schrödinger, LLC) before docking using Induced-fit docking employing default settings with Glide Extra Precision (XP) and OPLS 2005 force field. (*R*)-**1** was prior to docking prepared by LigPrep using default settings. The best pose was selected for redocking without any constraints using Maestro 2019-3 and OPLS3e force field.

## Stability of 57

### Stability test of 57 at 2-8 °C

0 h

<sup>1</sup>H NMR, DMSO-*d*<sub>6</sub>, 600 MHz

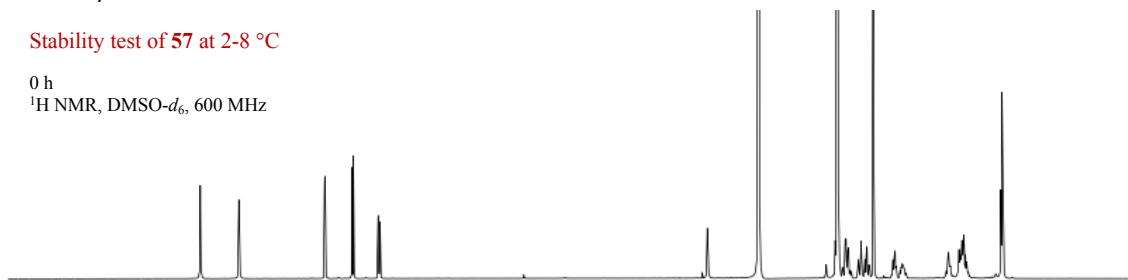

24 h

<sup>1</sup>H NMR, DMSO-*d*<sub>6</sub>, 600 MHz

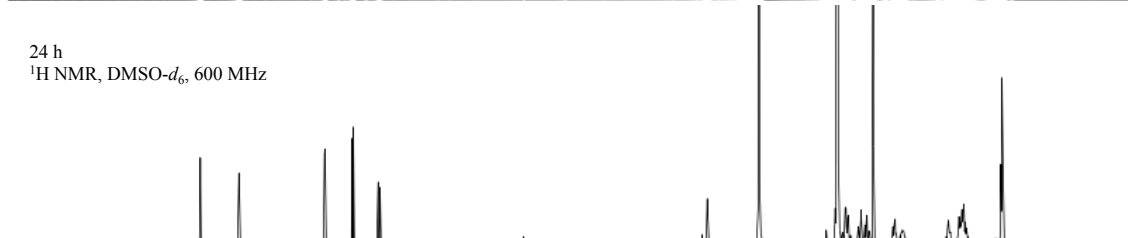

30 days

<sup>1</sup>H NMR, DMSO-*d*<sub>6</sub>, 600 MHz

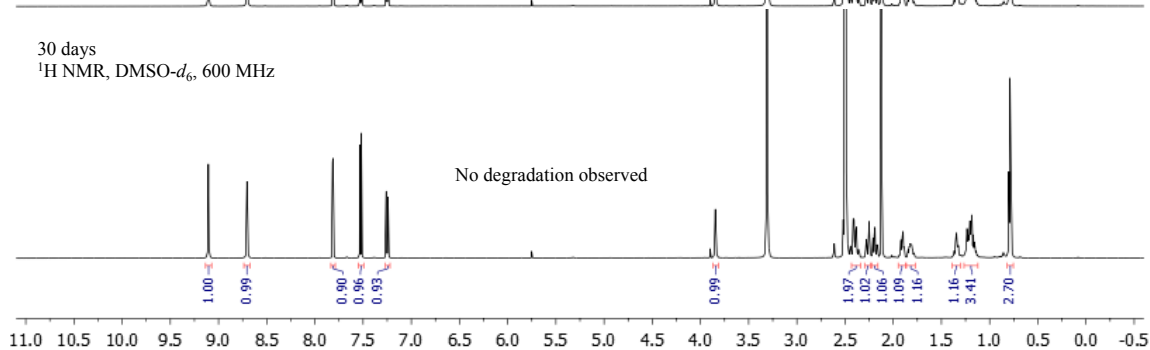

### Stability test of 57 at RT (~25 °C)

0 h

<sup>1</sup>H NMR, DMSO-*d*<sub>6</sub>, 600 MHz

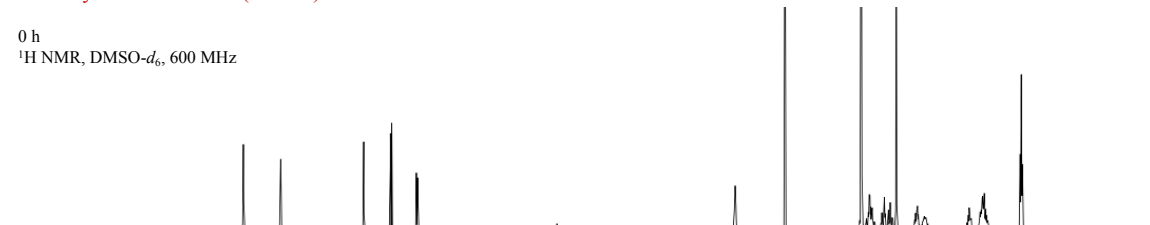

24 h

<sup>1</sup>H NMR, DMSO-*d*<sub>6</sub>, 600 MHz

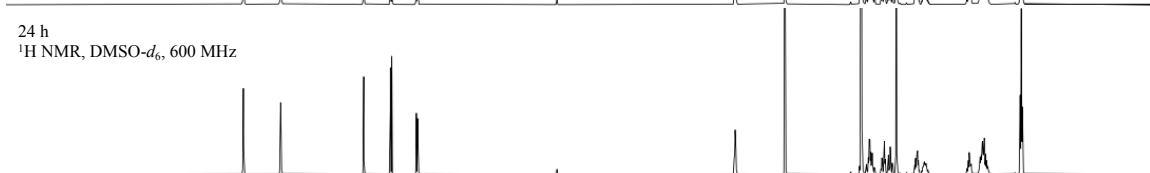

7 days

<sup>1</sup>H NMR, DMSO-*d*<sub>6</sub>, 600 MHz

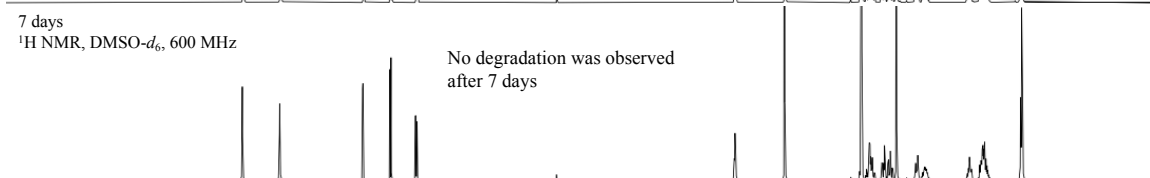

30 days

<sup>1</sup>H NMR, DMSO-*d*<sub>6</sub>, 600 MHz

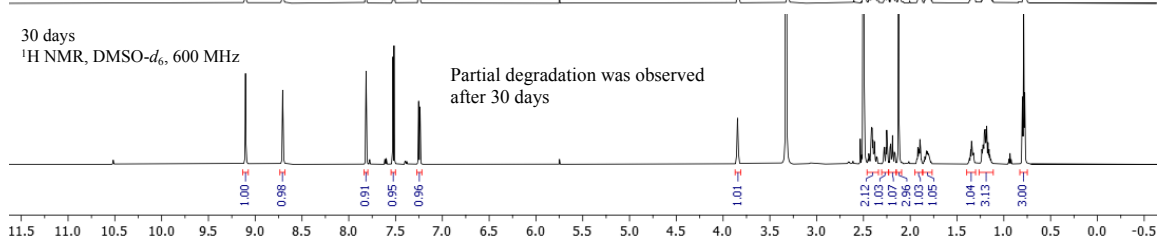

Counterscreen data on 1, 16, 57 and 63

|                                                                                                       | 1          | 16         | 57         | 63         |
|-------------------------------------------------------------------------------------------------------|------------|------------|------------|------------|
| GPR84, agonist, cAMP assay, 10 $\mu$ M                                                                | 1 $\pm$ 7% | 2 $\pm$ 4% | 1 $\pm$ 4% | 0 $\pm$ 1% |
| Cav1.2 (L-type) Human Calcium Ion Channel Binding (Antagonist Radioligand) Assay, Panlabs, 10 $\mu$ M | -20%       | 13%        | 12%        | 1%         |

**FFA2 (cAMP assay)**

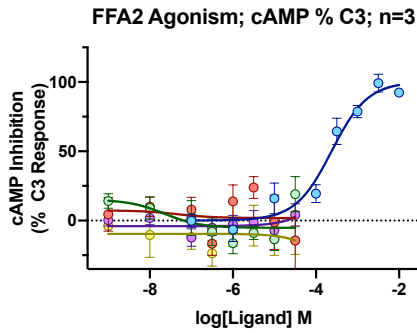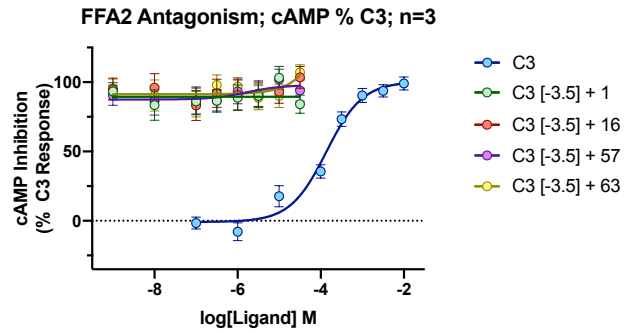

C3: propionate, reference agonist

**FFA1 (arrestin BRET assay)**

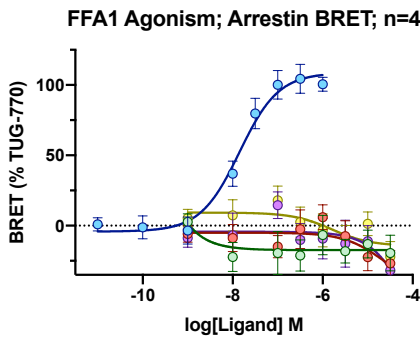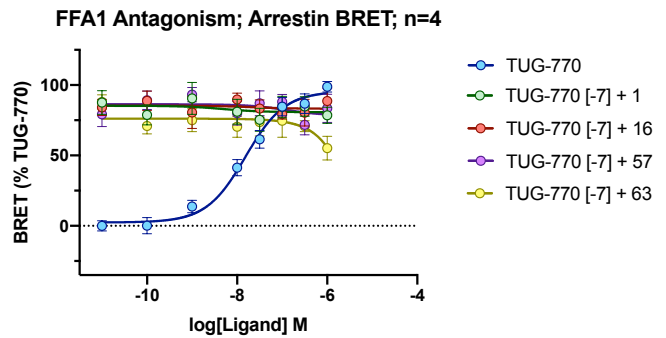

TUG-770: FFA1 agonist reference

**FFA4 (arrestin BRET assay)**

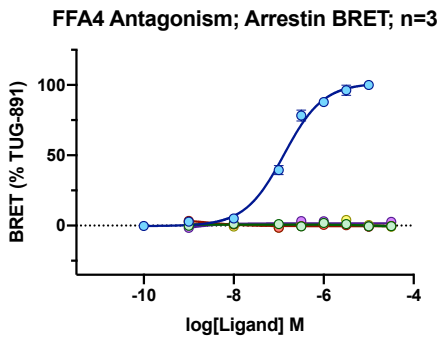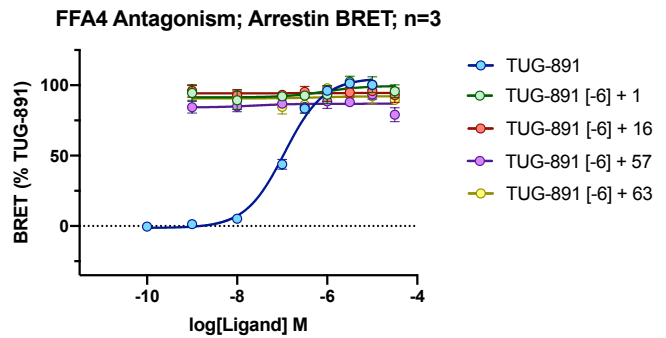

TUG-891: FFA4 agonist reference

## Counter screening against FFA1, FFA2, FFA4 and GPR84

Counter screening against FFA1 and FFA4 was carried out using a modified version of a previously described bioluminescence resonance energy transfer (BRET) designed to assess recruitment of  $\beta$ -arrestin-2 to each receptor.<sup>2</sup> Briefly, HEK293T cells were co-transfected with plasmids encoding either human FFA1 or human FFA4 tagged at their C-termini with eYFP and with a plasmid encoding  $\beta$ -arrestin-2 tagged at its N-terminal with Nanoluciferase. 24 h post transfection cells were seeded into black with clear bottom 96-well plates that had been coated with poly-D-lysine. Cells were then cultured a further 24 h prior to experiments. Cells were then washed twice with Hank's Balanced salt solution supplemented with 10 mM HEPES (HBSSH) then incubated at 37 °C in HBSSH for 30 min prior to running the assay. The Nluc substrate, coelenterazine h was then added to a final concentration of 5  $\mu$ M and cells were incubated at 37 °C for 10 min prior to adding test agonists. Following a further 5 min incubation, luminescent emission at 475 nm and 535 nm was measured using a Pherastar FS reader (BMG Labtech, Aylesbury, UK) plate reader set for bottom plate optics. The BRET ratio was then calculated as 535/475 emissions and all BRET ratio values were normalized against the maximal BRET ratio obtained using reference agonists for the respective receptors (TUG-891 for FFA4, TUG-770 for FFA1). For antagonism studies, the same protocol was used, however the antagonist was added 15 min prior to the addition of an EC<sub>80</sub> concentration of the reference agonist for each receptor.

Counter screening for FFA2 was carried out using a cAMP assay. Flp-In T-Rex 293 cells generated to stably express human FFA2 tagged at its C-terminal with eYFP were first treated with doxycycline (100 ng/mL) overnight to induce receptor expression. Cells were then detached and used directly in an HTR-FRET cAMP assay (CisBio) according to the manufacturer's protocol and measured using a Pherastar FS plate reader (BMG Labtech, Aylesbury, UK). For these experiments, 2000 cells were used per well in a low volume 384-well plate and compounds were tested against their ability to inhibit the cAMP response to 1  $\mu$ M forskolin for 30 min. Propionic acid was used as reference agonist and for antagonism studies the ability of compounds to inhibit the response to and EC<sub>80</sub> concentration of C3 was tested.

Counter screening for GPR84 was carried out using a cAMP assay. Flp-In T-Rex 293 cells generated to stably express human GPR84 tagged at its C-terminal with Gia were first treated with doxycycline (100 ng/mL) overnight to induce receptor expression. Cells were then detached and used directly in an HTR-FRET cAMP assay (CisBio) according to the manufacturer's protocol and measured using an Envision plate reader (PerkinElmer). For these experiments, 5000 cells were used per well in a low volume 384-well plate and compounds were tested against their ability to inhibit the cAMP response to 1  $\mu$ M forskolin for 45 min. TUG-1985 was used as reference agonist.

## References

1. Lu, J.; Byrne, N.; Wang, J.; Bricogne, G.; Brown, F. K.; Chobanian, H. R.; Colletti, S. L.; Di Salvo, J.; Thomas-Fowlkes, B.; Guo, Y.; Hall, D. L.; Hadix, J.; Hastings, N. B.; Hermes, J. D.; Ho, T.; Howard, A. D.; Josien, H.; Kornienko, M.; Lumb, K. J.; Miller, M. W.; Patel, S. B.; Pio, B.; Plummer, C. W.; Sherborne, B. S.; Sheth, P.; Souza, S.; Tummala, S.; Vorrhein, C.; Webb, M.; Allen, S. J.; Johnston, J. M.; Weinglass, A. B.; Sharma, S.; Soisson, S. M., Structural basis for the cooperative allosteric activation of the free fatty acid receptor GPR40. *Nat. Struct. Mol. Biol.* **2017**, *24* (7), 570-577.
2. Shimpukade, B.; Hudson, B. D.; Hovgaard, C. K.; Milligan, G.; Ulven, T., Discovery of a Potent and Selective GPR120 Agonist. *J. Med. Chem.* **2012**, *55* (9), 4511–4515.
